# Supplementary material for: TaNBR1, a Novel Wheat NBR1-like Domain Gene Negatively Regulates Drought Stress Tolerance in Transgenic Arabidopsis
Source: MDPI journal article supplement (doi:10.3390/ijms23094519), 2022-04-20
Supplement: s1 [file s1]

# ***TaNBR1*, a novel wheat NBR1 like domains gene, negatively regulates drought stress tolerance in transgenic *Arabidopsis***

Liuping Chen<sup>1</sup>, Qian Lv<sup>1</sup>, Weibing Yang<sup>1</sup>, Hui Yang<sup>2</sup>, Qiaoyan Chen<sup>3</sup>, Bingxin Wang<sup>1</sup>, Yanhong Lei<sup>1</sup>, and Yanzhou Xie<sup>1\*</sup>

<sup>1</sup> State Key Laboratory of Crop Stress Biology in Arid Areas and College of Agronomy, Northwest A&F University, Xianyang 712100, China; chenliupinghist@163.com (L.C.); lvqianhist@163.com (Q.L.); jy\_wheat@nwfau.edu.cn (W.Y.); wangbx@nwfau.edu.cn (B.W.); 2021060044@nwfau.edu.cn (Y.L.)

<sup>2</sup> Nanyang Academy of Agricultural Sciences, Nanyang, 473000, China; 13721807607@163.com (H. Y);

<sup>3</sup> College of Life and Science, Henan Institute of Science and Technology, Xinxiang, Henan 453000, China; CQY20100216@163.com (Q.C.);

\* Correspondence: Yzxie@nwsuaf.edu.cn ; Tel: +86 29 8708 2022.

**Table S1** Primer information used in these experiments

| Primer name | primer sequence                               | Function or vector |
|-------------|-----------------------------------------------|--------------------|
| TaNBR1 F1   | GGAATCGCGCCATGAT                              | cDNA amplification |
| TaNBR1 R1   | TTAATTAAGATATTCTCGCGCTACA                     |                    |
| gNBR1-1F    | ATGATGCCTCAACGGGACA                           | gDNA amplification |
| gNBR1-1R    | CCGCAGCCATCACATTCTAC                          |                    |
| gNBR1-2F    | TTAATTAAGATATTCTCGCGCTACA                     | gDNA amplification |
| gNBR1-2R    | ACCGTCGCCTCCAAAACC                            |                    |
| DNBR1F      | CCAGGTCTAAGATGTCGG                            | qRT-PCR            |
| DNBR1R      | CACTGGTGGTGCCGAT                              |                    |
| YNBR1F      | CGAGCTCAAGCTTCGAAATGATGCCTCAACGGGACAC         | 1302-EGFP          |
| YNBR1R      | CGTCGACTGCAGAATTCGAAATTAAGATATTCTCGCGCTACACAG |                    |
| AtActin F   | TCGCTGACCGTATGAGCAAAG                         | qRT-PCR            |
| AtActin R   | TGTGAACGATTCTTGACCTG                          |                    |
| P5CS1 F     | GCGCATAGTTTCTGATGCAA                          | qRT-PCR            |

|              |                            |         |
|--------------|----------------------------|---------|
| P5CS1 R      | TGCAACTTCGTGATCCTCTG       |         |
| COR15AF      | GGCCACAAAGAAAGCTTCAG       | qRT-PCR |
| COR15AR      | CTTGTTTGCGGCTTCTTTTC       |         |
| RD29A F      | ATCACTTGGCTCCACTGTTGTTC    | qRT-PCR |
| RD29A R      | ACAAAACACACATAAACATCCAAAGT |         |
| LEA14F       | GTCATTGATTCCGATCTGTGAGATC  | qRT-PCR |
| LEA14R       | CCCTACAACAGGAAGGTCGATGG    |         |
| RAB18F       | TCGGTCGTTGTATTGTGCTT       | qRT-PCR |
| RAB18R       | CCAGATGCTCATTACACACTCATG   |         |
| NCED3F       | ACCAACAAGAATGCCTTCCA       | qRT-PCR |
| NCED3R       | TAACAGAAACCAGCTGAGCTCGA    |         |
| TaACTIN F    | CTCCCTCACAACAACCGC         | qRT-PCR |
| TaACTIN<br>R | TACCAGGAACTTCCATACCAAC     |         |

---
